# Supplementary material
Source: publisher site journal article supplement (https://www.dovepress.com/article/496656)
Supplement: Supplementary file 1 [file get_supplementary_file.php]

| **Univariate Cox Regression Analysis** | | | | **Multivariate Cox Regression Analysis** | | |
| --- | --- | --- | --- | --- | --- | --- |
| Variate | HR | 95%CI | p | HR | 95%CI | p |
| Age ≥ 65 | 1.8 | 1.32–2.43 | < 0.001 | 1.4 | 1.1- 1.8 | 0.021 |
| Gender (Female) | 0.95 | 0.51–1.2 | 0.042 | 0.7 | 0.5 - 9.8 | 0.042 |
| BMI ≥30 kg/m2 | 0.68 | 0.39–1.08 | 0.09 | – | – | – |
| Smoking | 1.00 | 0.63–1.16 | 0.316 | – | – | – |
| Hypertension | 1.6 | 1.1–1.9 | 0.042 | 1.5 | 1.0 - 2.4 | 0.010 |
| Diabetes | 1.7 | 1.23–2.55 | 0.032 | 1.4 | 1.18–2.52 | 0.134 |
| Hemoglobin, per g/L increase | 0.98 | 0.94–0.99 | < 0.001 | 0.9 | 0.91 - 0.99 | 0.001 |
| Previous MI | 1.5 | 1.1–1.9 | 0.03 | – | – | – |
| Previous Revascularization | 1.6 | 1.15–2.86 | < 0.001 | 1.09 | 1.1–1.315 | 0.349 |
| Previous bleed ≥ BARC 2 | 2.5 | 1.7–3.2 | < 0.001 | 2.1 | 1.4 - 3.7 | 0.004 |
| eGFR, <60 ml/min/1.73 m2 | 1.5 | 1.3-2.8 | 0.01 | 0.99 | 0.987–1.009 | 0.746 |
| WBC | 0.85 | 0.71–1.03 | 0.105 | – | – | – |
| Lymphocyte | 0.84 | 0.69–1.02 | 0.096 | – | – | – |
| Albumin <3.8 | 0.79 | 0.63–1.00 | 0.051 | – | – | – |
| Creatinine < 1 | 1.00 | 0.87–1.15 | 0.276 | 1.05 | 0.992–1.111 | 0.091 |
| Multivessel disease | 1.1 | 0.748–1.65 | 0.542 | – | – | – |
| Multivessel intervention | 1.03 | 1.01–1.06 | 0.08 | – | – | – |
| Statins | 0.89 | 0.67–1.01 | 0.524 | – | – | – |
| β-blockers | 0.87 | 0.59–1.02 | 0.485 | – | – | – |
| ACE inhibitors/ARB’s | 1.03 | 0.957–1.1 | 0.236 | – | – | – |
| Aspirin | 0.61 | 0.45-0.98 | 0.354 |  |  |  |
| P2Y12 receptor inhibitor | 1.2 | 0.75-1.8 | 0.326 |  |  |  |
| PNI < 42.7 | 2.1 | 1.63–3.43 | < 0.001 | 1.7 | 1.1 - 2.5 | 0.003 |

**Supplementary Table 1 Univariate and Multivariate Cox Regression Analysis**
